# Supplementary material for: Ecofriendly Synthesis of Silver Nanoparticles from Garden Rhubarb (Rheum rhabarbarum)
Source: Hindawi journal article supplement (doi:10.1155/2016/4964752), 2016-01-01
Supplement: f1 [file 4964752.f1.pdf]

**SUPPLEMENTARY MATERIAL**

**Ecofriendly Synthesis of Silver Nanoparticles from Garden Rhubarb**  
**(*Rheum rhabarbarum*)**

Palem Ramasubba Reddy, Shimoga D. Ganesh, Nabanita Saha\*

Oyunchimeg Zandraa and Petr Sába

Centre of Polymer Systems, University Institute, Tomas Bata University in Zlin,

Tř. T. Bati 5678, Zlin 760 01, Czech Republic

\* Corresponding author. E-mail: [nabanita@cps.utb.cz](mailto:nabanita@cps.utb.cz), Tel. +420 57 603 8156

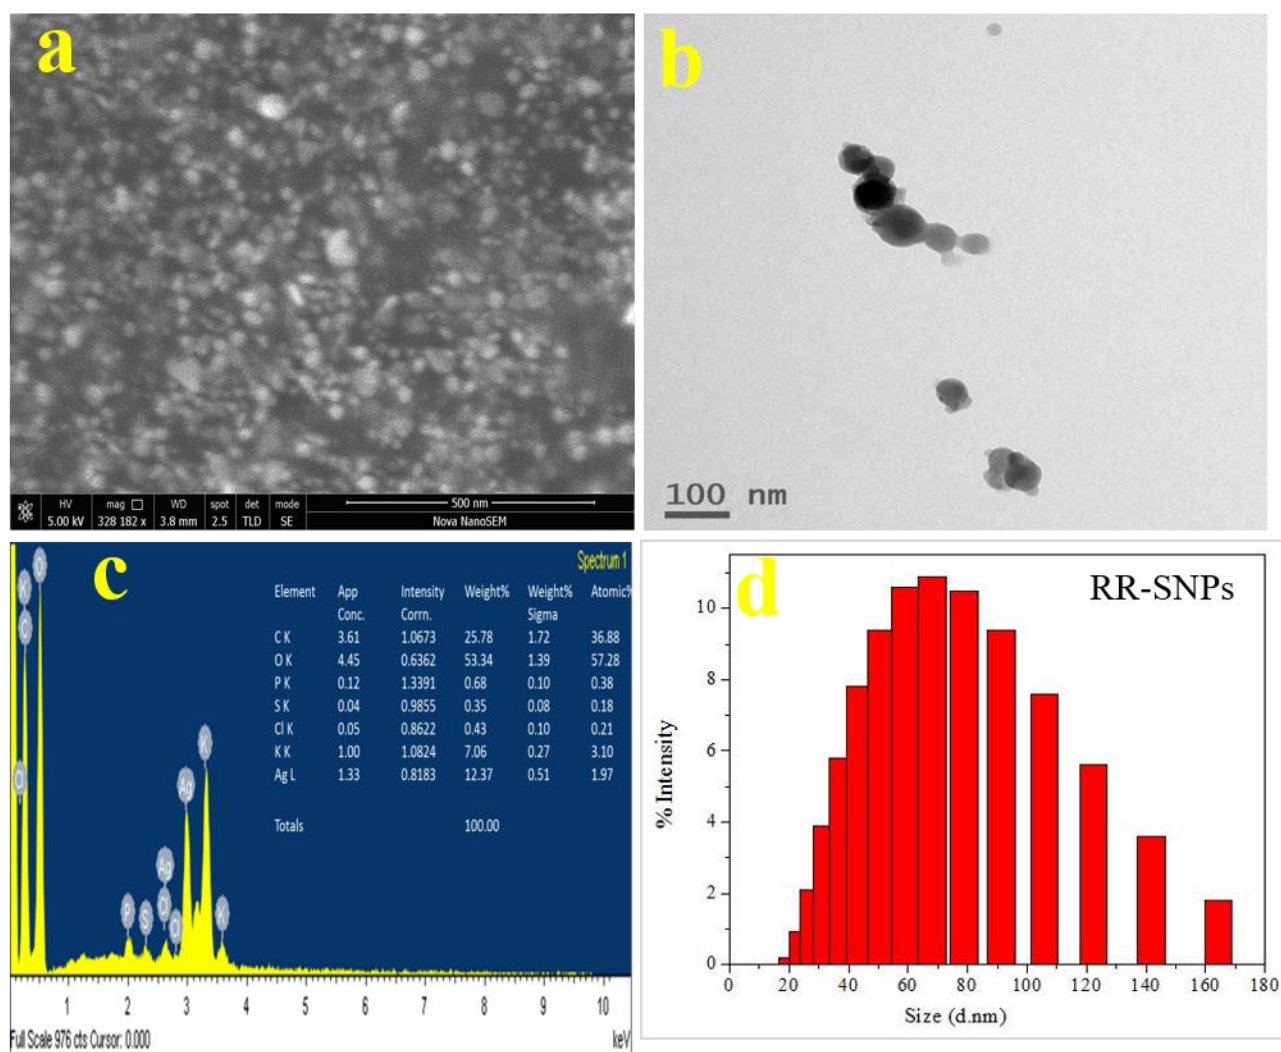

**Figure S1.** Spectroanalytical characterization of biogenic RR-SNPs: (a) SEM micrograph (b) TEM image (c) EDX Spectrum (d) Histogram of particle size distribution.

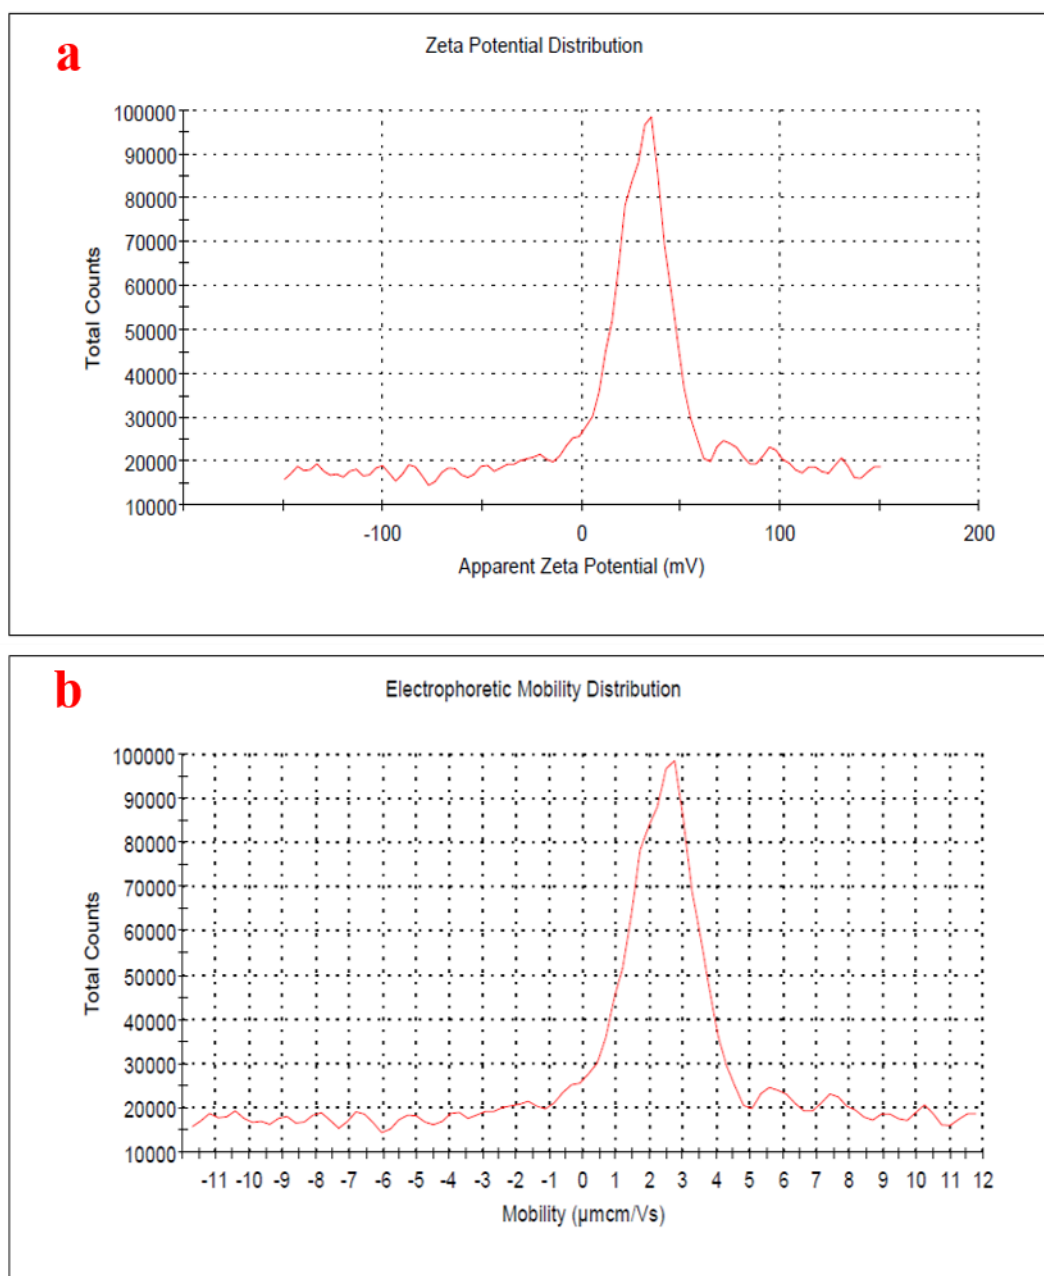

**Figure S2.** (a) Zeta potential, (b) Electrophoretic mobility distribution of of RR-SNPs on 120<sup>th</sup> day after biosynthesis

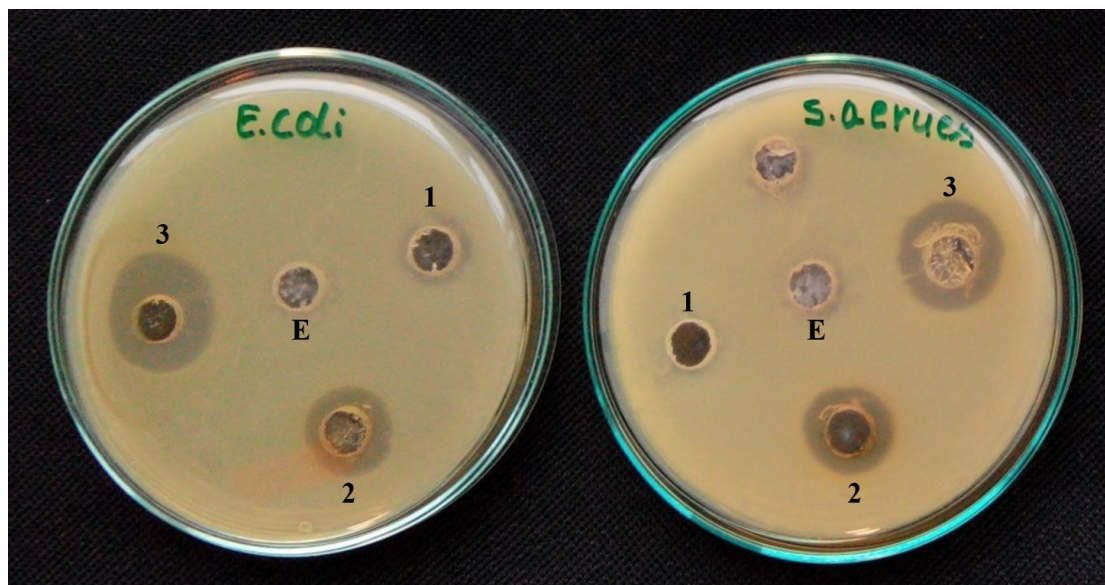

**Figure S3.** Antibacterial activity of RR-SNPs against gram positive (*S. aureus*) and gram negative (*E. coli*) bacteria. [Where, E = RR, 1 = (RR 4ml + 5 $\mu$ L AgNO<sub>3</sub>), 2 = (RR 4ml + 10 $\mu$ L AgNO<sub>3</sub>), and 3 = (RR 4ml + 15 $\mu$ L AgNO<sub>3</sub>)]
